# Supplementary material
Source: PubMed Central journal article supplement (PMC9773012)
Supplement: NIHMS1859081-supplement-SI.pdf [file NIHMS1859081-supplement-SI.pdf]

## Supporting Information

### **GLOW: A workflow integrating Gaussian accelerated molecular dynamics and Deep Learning for free energy profiling**

**Hung N. Do<sup>1</sup>, Jinan Wang<sup>1</sup>, Apurba Bhattarai<sup>1</sup>, Yinglong Miao<sup>1,\*</sup>**

<sup>1</sup>The Center for Computational Biology and Department of Molecular Biosciences, The University of Kansas, Lawrence, Kansas 66047

\*Corresponding author: [miao@ku.edu](mailto:miao@ku.edu)

**Figure S1. Learning curves of the training and validation datasets for the A<sub>1</sub>AR activation (A and B) and allosteric modulation (C and D). The metrics used here are loss (A and C) and accuracy (B and D).**

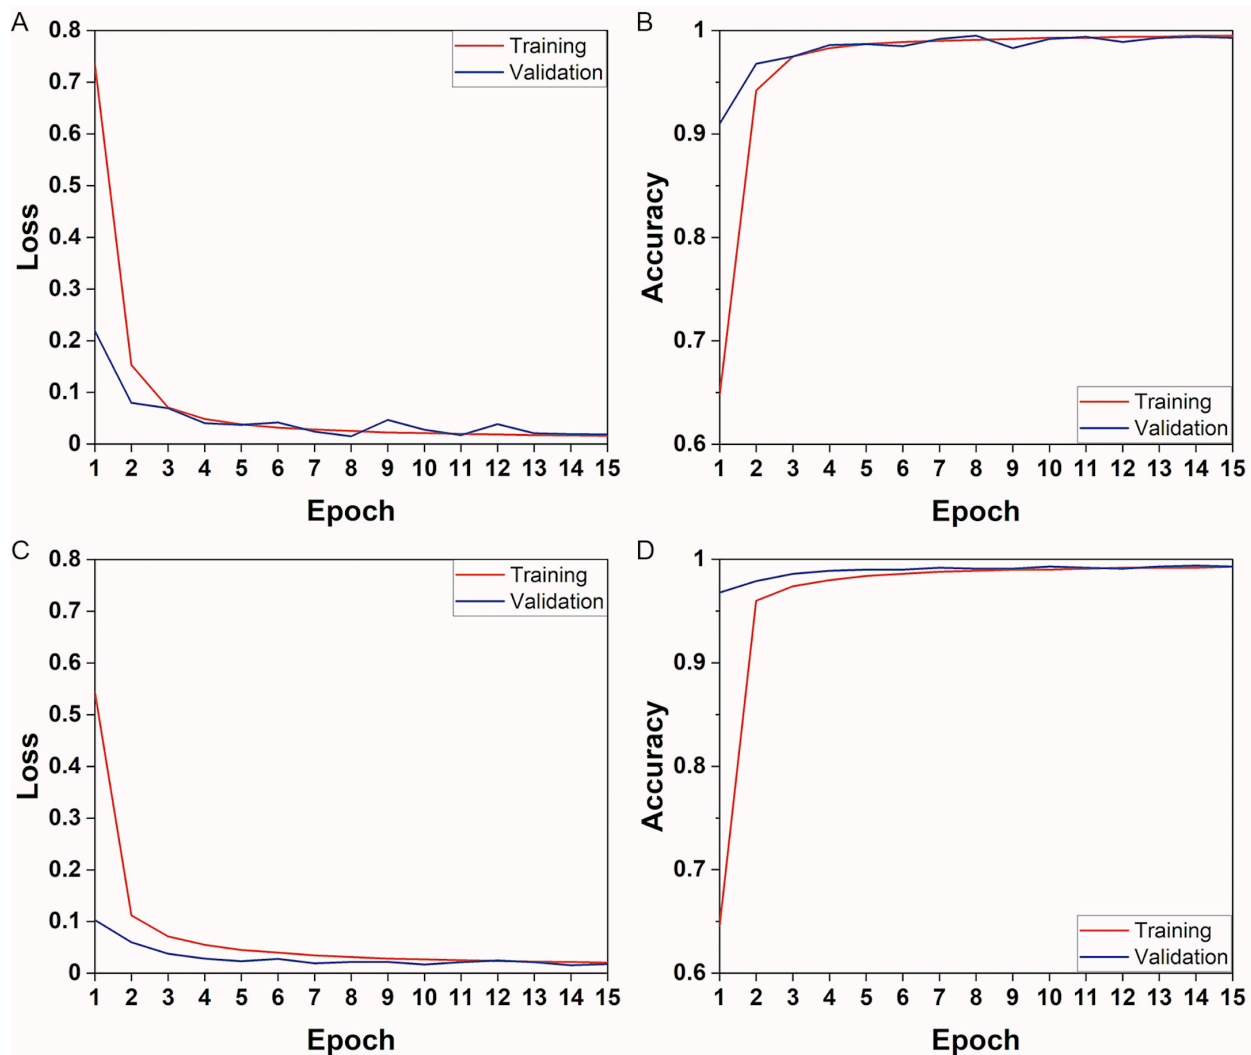

**Figure S2. Saliency (attention) maps of residue contact gradients of the A<sub>1</sub>AR bound by (A) “Antagonist”, (B) “Agonist” and (C) “Agonist – Gi”. The seven transmembrane helices are labeled from I to VII. The gradient of each residue contact is shown in a 0 (blue) to 1 (red) color scale.**

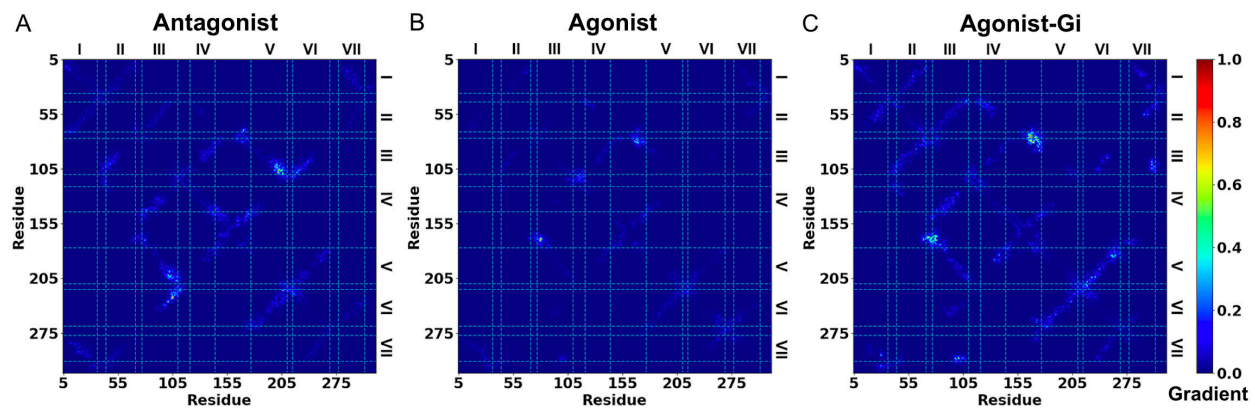

**Figure S3. Locations of characteristic residue contacts in the activation of the A<sub>1</sub>AR, which are shown in sticks and spheres and colored in red.**

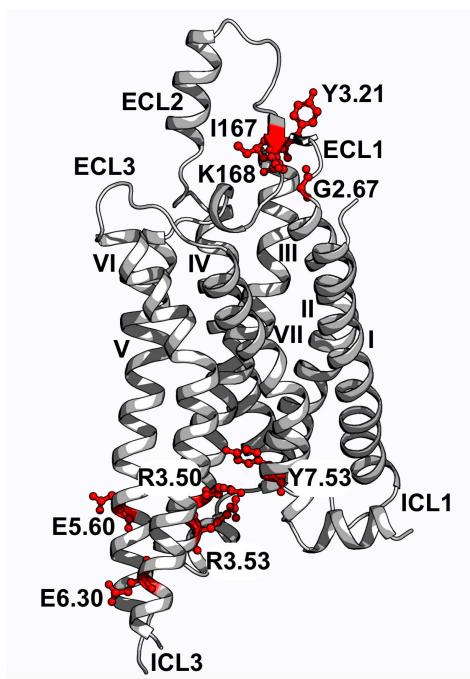



**Figure S4. Time courses of selected reaction coordinates for free energy profiling of activation of A<sub>1</sub>AR.**

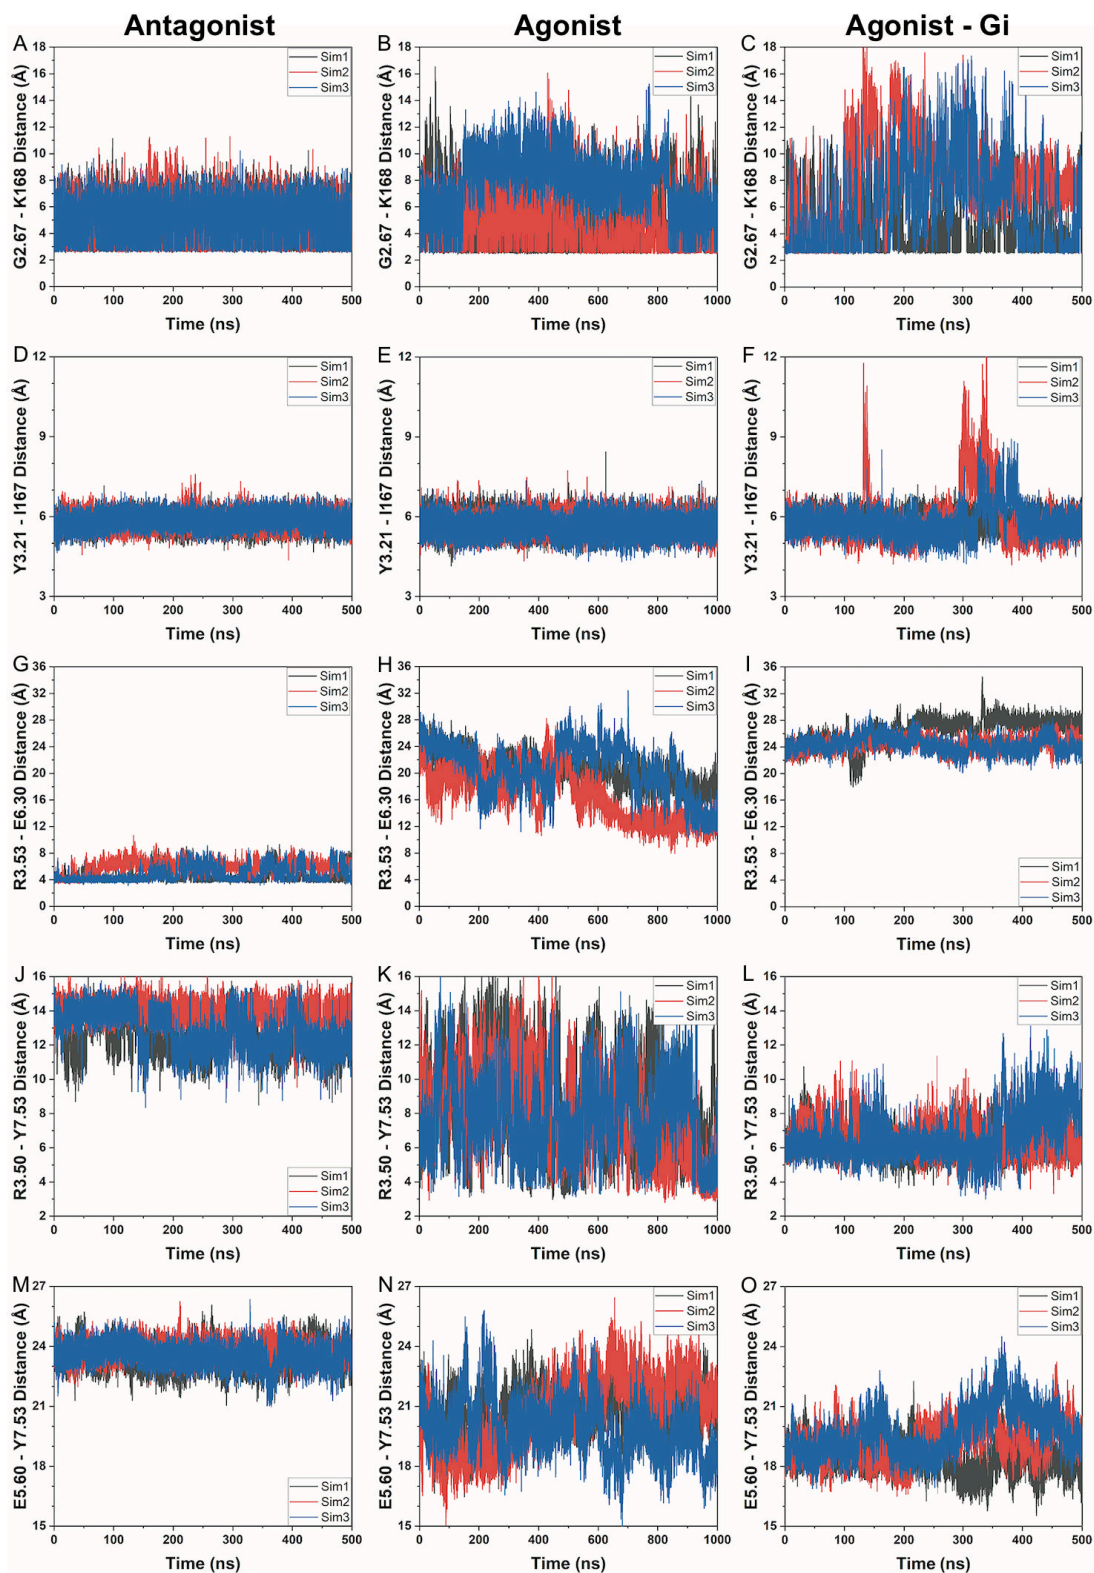

**Figure S5. Saliency (attention) maps of residue contact gradients of the A<sub>1</sub>AR bound by (A) “Agonist – Gi” and (B) “Agonist – Gi – PAM”. The seven transmembrane helices are labeled from I to VII. The gradient of each residue contact is shown in a 0 (blue) to 1 (red) color scale.**

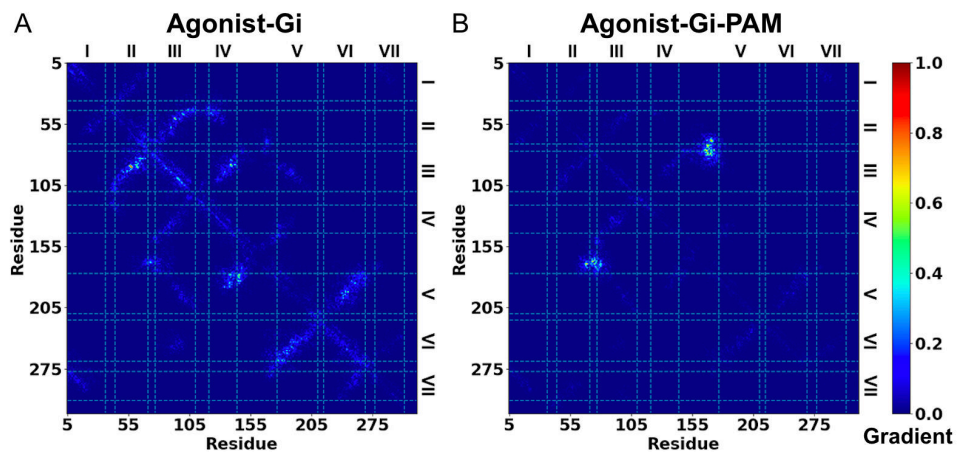

**Figure S6. Locations of characteristic residue contacts in the allosteric modulation of the A<sub>1</sub>AR, which are shown in sticks and spheres and colored in red.**

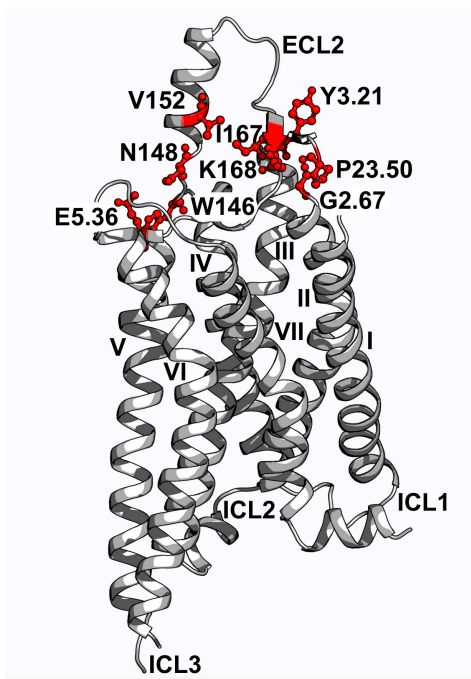

**Figure S7. Time courses of selected reaction coordinates for free energy profiling of allosteric modulation of A<sub>1</sub>AR.**

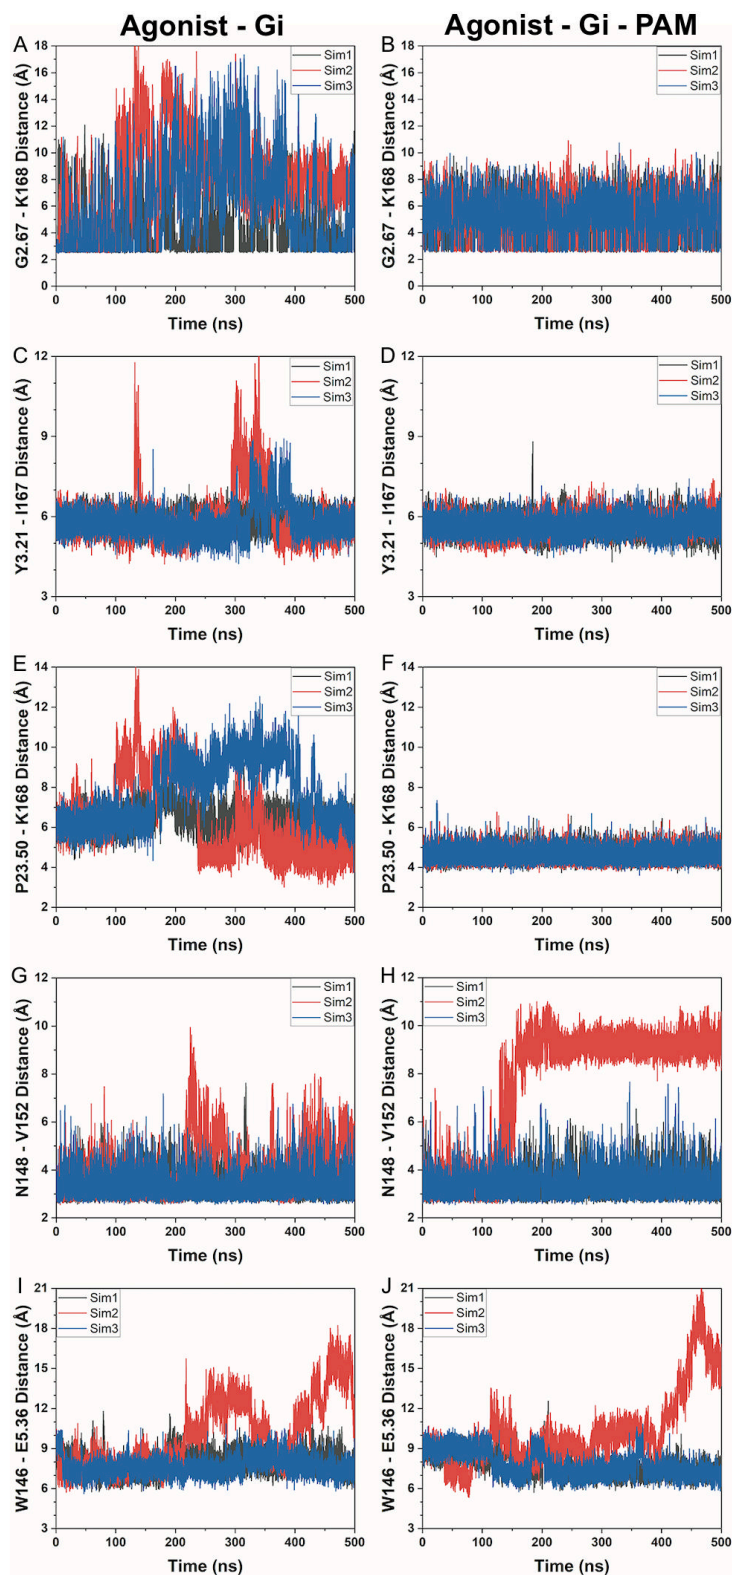



**Figure S8. Independent Deep Learning analyses of the A<sub>1</sub>AR activation and allosteric modulation with random assignments of training and validation datasets. (A-G) Confusion matrices and saliency (attention) maps of residue contact gradients calculated from the first DL model (also shown in **Figures 2** and **5**). (H-N) Confusion matrices and saliency (attention) maps of residue contact gradients from the second DL model. (O-U) Confusion matrices and saliency (attention) maps of residue contact gradients from the third DL model.**

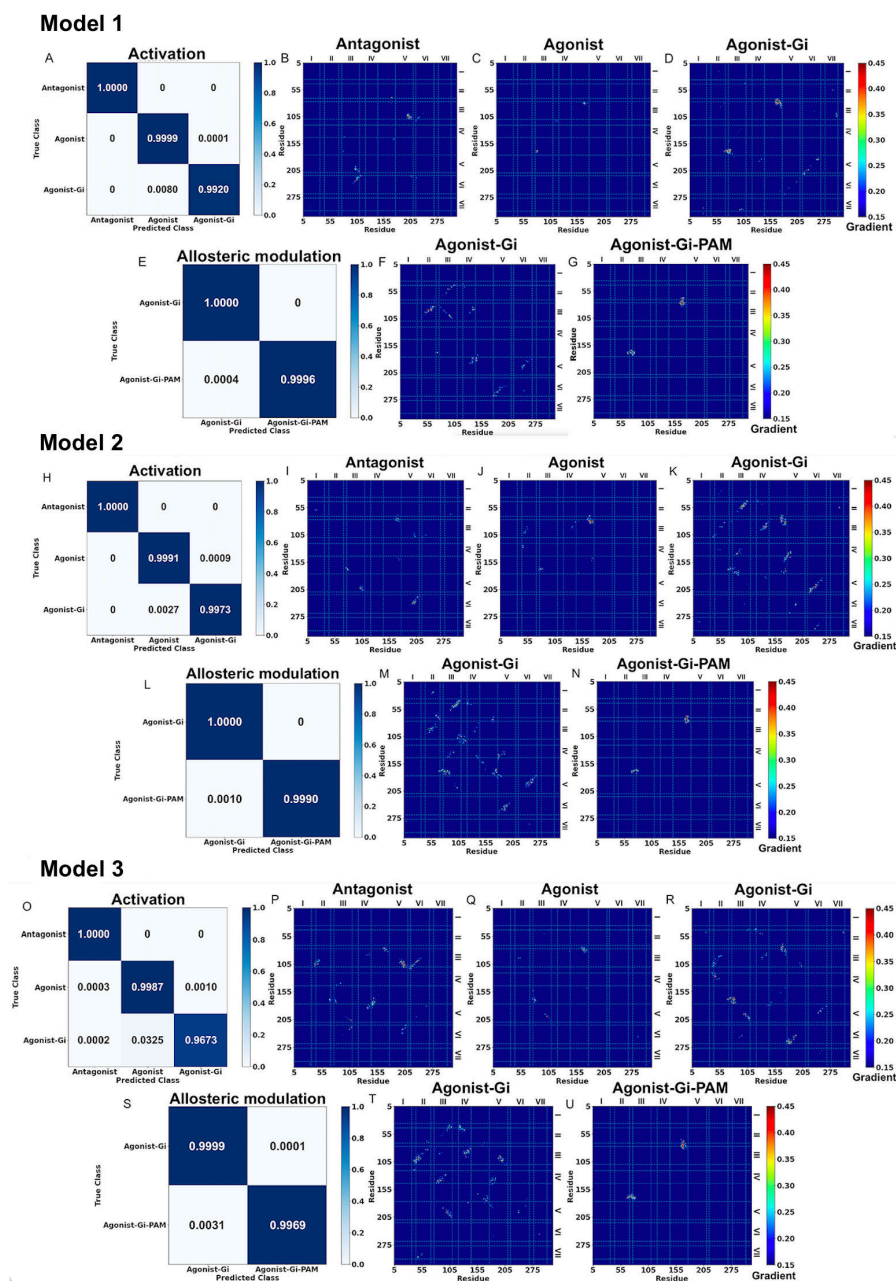

**Figure S9. Flexibility of the adenosine receptor domain in the A<sub>1</sub>AR bound by “Antagonist”, “Agonist”, “Agonist – Gi” and “Agonist – Gi – PAM” observed in GaMD simulations. The root-mean-square fluctuations (RMSF) are shown in a blue (0Å) – white – red (4Å) color scale.**

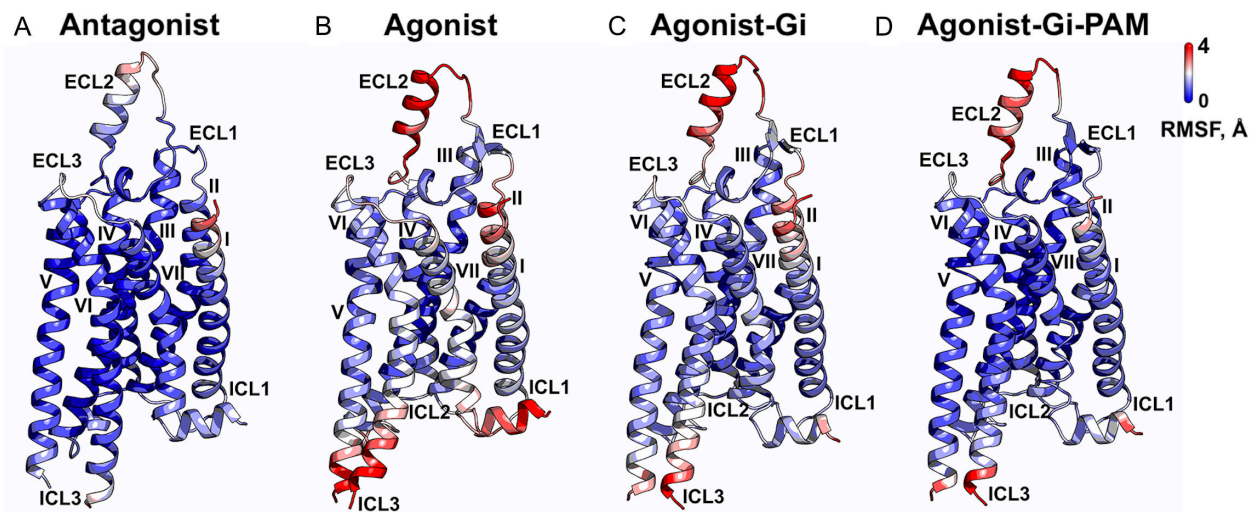

**Table S1. Summary of GaMD simulations performed on the model A<sub>1</sub>AR systems, including the A<sub>1</sub>AR bound by “Antagonist”, “Agonist”, “Agonist – Gi” and “Agonist – Gi – PAM”.**

| <b>System</b>        | <b>Method</b> | <b>Simulation Length</b> | <b>Boost Potential (kcal/mol)</b> |
|----------------------|---------------|--------------------------|-----------------------------------|
| "Antagonist"         | GaMD_Dual     | 3 x 500 ns               | 15.07 ± 4.53                      |
| "Agonist"            | GaMD_Dual     | 3 x 1000 ns              | 17.07 ± 5.01                      |
| "Agonist - Gi"       | GaMD_Dual     | 3 x 500 ns               | 18.32 ± 6.29                      |
| "Agonist - Gi - PAM" | GaMD_Dual     | 3 x 500 ns               | 20.53 ± 6.54                      |

**Table S2. Characteristic residue contacts (whose gradients from pixel attribution  $\geq 0.4$ ) of the A<sub>1</sub>AR activation.**

| Gradient | "Antagonist"                                                                                                       | "Agonist"                    | "Agonist - Gi"                                                                                                                                                                                                                                                                                          |
|----------|--------------------------------------------------------------------------------------------------------------------|------------------------------|---------------------------------------------------------------------------------------------------------------------------------------------------------------------------------------------------------------------------------------------------------------------------------------------------------|
| 0.9      | R3.50-I6.33    Y3.51-E5.60                                                                                         | C3.25-E45.51 <sup>ECL2</sup> | Q23.51 <sup>ECL1</sup> -K168 <sup>ECL2</sup> T23.52 <sup>ECL1</sup> -V166 <sup>ECL2</sup><br>C3.25-C45.50 <sup>ECL2</sup>                                                                                                                                                                               |
| 0.8      | R3.53-E6.30                                                                                                        |                              | Q23.51 <sup>ECL1</sup> -I167 <sup>ECL2</sup> Y3.21-I167 <sup>ECL2</sup><br>I3.46-Y7.53                                                                                                                                                                                                                  |
| 0.7      | R3.50-A6.34                                                                                                        | C3.25-C45.50 <sup>ECL2</sup> | R3.50-Y7.53    Y3.21-V166 <sup>ECL2</sup>                                                                                                                                                                                                                                                               |
| 0.6      | V3.54-L5.64                                                                                                        |                              | P23.50 <sup>ECL1</sup> -I167 <sup>ECL2</sup> F3.22-I167 <sup>ECL2</sup>                                                                                                                                                                                                                                 |
| 0.5      | R3.50-V5.61    Y3.51-V5.61<br>P34.50 <sup>I<sub>CL2</sub></sup> -Y6.27    I3.46-L6.37                              | C3.25-I167 <sup>ECL2</sup>   | G2.67-K168 <sup>ECL2</sup> Q23.51 <sup>ECL1</sup> -I167 <sup>ECL2</sup><br>F3.22-P165 <sup>ECL2</sup> C3.25-I167 <sup>ECL2</sup><br>C3.25-V174 <sup>ECL2</sup> L3.43-Y7.53<br>N5.42-H6.52    F5.62-A6.34                                                                                                |
| 0.4      | I2.64-E45.51 <sup>ECL2</sup> A3.47-V5.61<br>Y3.51-I5.57    V3.54-I5.65<br>P34.50 <sup>I<sub>CL2</sub></sup> -Y6.26 |                              | V1.53-P7.50    I2.64-C45.50 <sup>ECL2</sup><br>I2.66-K168 <sup>ECL2</sup> P23.50 <sup>ECL1</sup> -K168 <sup>ECL2</sup><br>T23.52 <sup>ECL1</sup> -K168 <sup>ECL2</sup> C3.25-K168 <sup>ECL2</sup><br>Y3.21-P165 <sup>ECL2</sup> L3.33-I175 <sup>ECL2</sup><br>Y5.40-F6.60    F5.43-I6.53<br>R5.66-E6.30 |



**Table S3. Characteristic residue contacts (whose gradients from pixel attribution  $\geq 0.4$ ) of the A<sub>1</sub>AR allosteric modulation.**

| Gradient | "Agonist -Gi"                                                                                                                                                                                                                                                                                                                                                               | "Agonist - Gi - PAM"                                                                                                                                                                                                                                                                                           |
|----------|-----------------------------------------------------------------------------------------------------------------------------------------------------------------------------------------------------------------------------------------------------------------------------------------------------------------------------------------------------------------------------|----------------------------------------------------------------------------------------------------------------------------------------------------------------------------------------------------------------------------------------------------------------------------------------------------------------|
| 0.9      | V2.53-L3.35                                                                                                                                                                                                                                                                                                                                                                 |                                                                                                                                                                                                                                                                                                                |
| 0.8      |                                                                                                                                                                                                                                                                                                                                                                             | I2.64-C45.50 <sup>ECL2</sup>                                                                                                                                                                                                                                                                                   |
| 0.7      | S2.45-S3.38                      L3.33-G4.57                                                                                                                                                                                                                                                                                                                                | Q23.51 <sup>ECL1</sup> -I167 <sup>ECL2</sup> Y3.21-V166 <sup>ECL2</sup><br>F3.22-I167 <sup>ECL2</sup>                                                                                                                                                                                                          |
| 0.6      | A2.52-L3.35                      W146 <sup>ECL2</sup> -E5.36<br>M5.35-L6.59                                                                                                                                                                                                                                                                                                 | L2.63-C45.50 <sup>ECL2</sup> I2.64-F45.52 <sup>ECL2</sup><br>G2.67-K168 <sup>ECL2</sup> P23.50 <sup>ECL1</sup> -I167 <sup>ECL2</sup><br>P23.50 <sup>ECL1</sup> -K168 <sup>ECL2</sup> T23.52 <sup>ECL1</sup> -V166 <sup>ECL2</sup><br>T23.52 <sup>ECL1</sup> -C45.50 <sup>ECL2</sup> Y3.21-I167 <sup>ECL2</sup> |
| 0.5      | L2.46-S3.39                      L2.60-V3.28<br>I3.34-L4.58                                                                                                                                                                                                                                                                                                                 | G2.67-C45.50 <sup>ECL2</sup> C3.25-I167 <sup>ECL2</sup><br>C3.25-C45.50 <sup>ECL2</sup>                                                                                                                                                                                                                        |
| 0.4      | T2.39-D3.49                      F2.42-A3.45<br>A2.49-S3.38                      P23.50 <sup>ECL1</sup> -K168 <sup>ECL2</sup><br>L3.33-P4.60                      N148 <sup>ECL2</sup> -V152 <sup>ECL2</sup><br>I3.40-L3.44                      L3.41-A3.45<br>L3.44-V3.48                      E5.36-L6.59<br>V5.39-L6.59                      V5.47-W6.48<br>P5.50-F6.44 | Q23.51 <sup>ECL1</sup> -K168 <sup>ECL2</sup> Y3.21-P165 <sup>ECL2</sup><br>F3.22-K173 <sup>ECL2</sup>                                                                                                                                                                                                          |

**Table S4. Distances between selected characteristic residue pairs for 2D free energy profiling of the A<sub>1</sub>AR activation in the inactive 5N2S and 5UEN and active 6D9H and 7LD3 PDB structures.**

| <b>Residues</b>              | <b>5N2S</b> | <b>5UEN</b> | <b>6D9H</b> | <b>7LD3</b> |
|------------------------------|-------------|-------------|-------------|-------------|
| G2.67 - K168 <sup>ECL2</sup> | 4.8 Å       | 6.9 Å       | 5.0 Å       | 2.5 Å       |
| Y3.21 - I167 <sup>ECL2</sup> | 5.1 Å       | 5.5 Å       | 5.7 Å       | 5.6 Å       |
| R3.53 - E6.30                | 5.4 Å       | 4.3 Å       | 21.5 Å      | 21.4 Å      |
| R3.50 - Y7.53                | 8.8 Å       | 11.6 Å      | 6.3 Å       | 5.6 Å       |
| E5.60 - Y7.53                | 22.6 Å      | 22.6 Å      | 19.0 Å      | 18.4 Å      |

**Table S5. Distances between selected characteristic residue pairs for 2D free energy profiling of the A<sub>1</sub>AR allosteric modulation in the inactive 5N2S and 5UEN and active 6D9H and 7LD3 PDB structures.**

| <b>Residues</b>                               | <b>5N2S</b> | <b>5UEN</b> | <b>6D9H</b> | <b>7LD3</b> |
|-----------------------------------------------|-------------|-------------|-------------|-------------|
| G2.67 - K168 <sup>ECL2</sup>                  | 4.8 Å       | 6.9 Å       | 5.0 Å       | 2.5 Å       |
| Y3.21 - I167 <sup>ECL2</sup>                  | 5.1 Å       | 5.5 Å       | 5.7 Å       | 5.6 Å       |
| P23.50 <sup>ECL1</sup> - K168 <sup>ECL2</sup> | 5.0 Å       | 6.3 Å       | 5.4 Å       | 4.7 Å       |
| N148 <sup>ECL2</sup> - V152 <sup>ECL2</sup>   | 3.6 Å       | 2.8 Å       | 3.0 Å       | 3.1 Å       |
| W146 <sup>ECL2</sup> - E5.36                  | 9.3 Å       | 9.1 Å       | 9.5 Å       | 8.9 Å       |
